# Supplementary figures and images for: Technical note: an interannual inversion method forcontinuous CO 2 data
Source: Copernicus journal article supplement (doi:10.5194/acp-4-477-2004), 2004-03-24

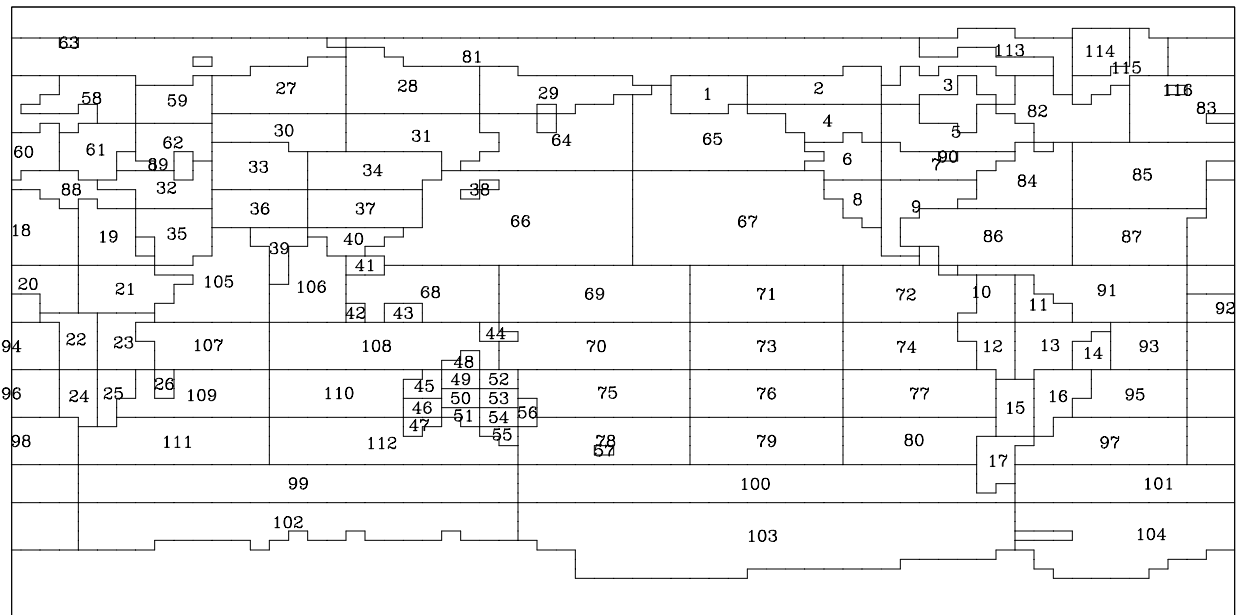

Supplement: Supplementary file 1 [file Fig_S1.pdf › Fig_S1.pdf]
